# Supplementary material for: Improved MALDI imaging MS analysis of phospholipids using graphene oxide as new matrix
Source: PubMed Central journal article supplement — Sci Rep. 2017 Mar 15;7:44466. doi: 10.1038/srep44466 (PMC5353552; doi:10.1038/srep44466), 2017-03-15
Supplement: srep44466-s1.pdf [file srep44466-s1.pdf]

# Supporting Information

## Improved MALDI imaging MS analysis of phospholipids using graphene oxide as new matrix

Zhongjie Wang §<sup>a</sup>, Yan Cai §<sup>b</sup>, Yi Wang<sup>a</sup>, Xinwen Zhou<sup>a</sup>, Ying Zhang<sup>\*a,c</sup>,  
and Haojie Lu<sup>\*a,b,c</sup>

<sup>a</sup>Shanghai Cancer Center and Institutes of Biomedical Sciences, Fudan University,  
Shanghai 200032, P. R. China.

<sup>b</sup>Department of Chemistry, Fudan University, Shanghai, 200433, P. R. China

<sup>c</sup>Key Laboratory of Glycoconjugates Research Ministry of Public Health,  
Fudan University, Shanghai 200032, P. R. China

§ These authors contributed equally to this work.

\*Corresponding author, E-mail: ying@fudan.edu.cn, luhaojie@fudan.edu.cn

### ESI-QqQ MS/MS parameters

| ESI-parameters | Positive mode | Negative mode |
|----------------|---------------|---------------|
| CUR            | 20.00         | 10.00         |
| IS             | 5500.00       | -4500.00      |
| GS1            | 10.00         | 10.00         |

| Lipid class | Ion mode | Scan mode     | Collision energy (eV) |
|-------------|----------|---------------|-----------------------|
| PC&SM       | +        | parents (184) | 40                    |
| PE          | +        | NL (141)      | 35                    |
| PS          | -        | NL (87)       | 40                    |

### Supplementary

**Fig. S1.** SEM image of graphene oxide provided by the manufacturer.

**Fig. S2.** TEM image of graphene oxide provided by manufacturer.

**Fig. S3.** AFM image of graphene oxide provided by manufacturer.

**Fig. S4.** FT-IR absorption spectra of graphene oxide provided by manufacturer.

**Fig. S5.** Digital photographs of co-crystal of four standard phospholipid species with (a) DHB and (b) GO. For each spot, 1  $\mu$ L of phospholipid mixture and 1  $\mu$ L of matrix solution were mixed together and 1  $\mu$ L of the mixture was spotted on the MALDI plate by the pipette.

**Fig. S6.** Comparison of shot-to-shot stability of individual phospholipid solution with DHB (black circle) and GO (blue square). Each sample spot was prepared by applying 1  $\mu$ L of phospholipid solution with 1  $\mu$ L of DHB or 1  $\mu$ L of GO to the MALDI plate. For each shot, the mass spectrum was acquired from random locations in one spot by applying 200 laser shots and 50 sub-spectra pass acceptance.

**Fig. S7.** Comparison of spot-to-spot stability of individual phospholipid solution with DHB (black circle) and GO (blue square). Each sample spot was prepared by applying 1  $\mu$ L of phospholipid solution with 1  $\mu$ L of DHB or 1  $\mu$ L of GO to the MALDI plate. For each spot, the mass spectrum was acquired from random locations by applying 200 laser shots and 50 sub-spectra pass acceptance.

**Fig. S8.** Further confirmation of molecular peak assignment in MALDI-IMS by ESI QqQ-MS/MS for (a) PC (+ parents 184); (b) PE (+ NL 141) and (c) PS (- NL 87).

**Table S1.** Lipids detected from mouse brain tissue section by MALDI-TOF MS in positive mode using GO.

**Table S2.** Lipids detected from mouse brain tissue section by MALDI-TOF MS in positive mode using DHB

**Fig. S1.**

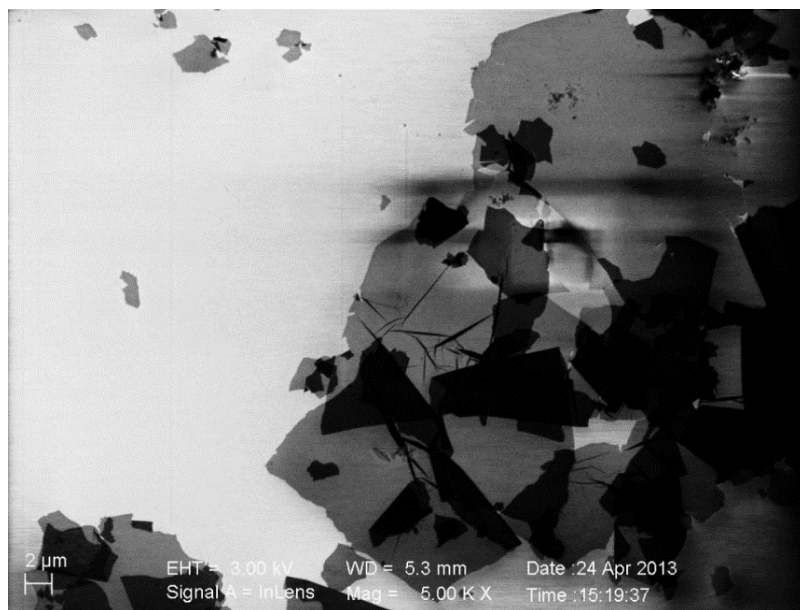

**Fig. S2.**

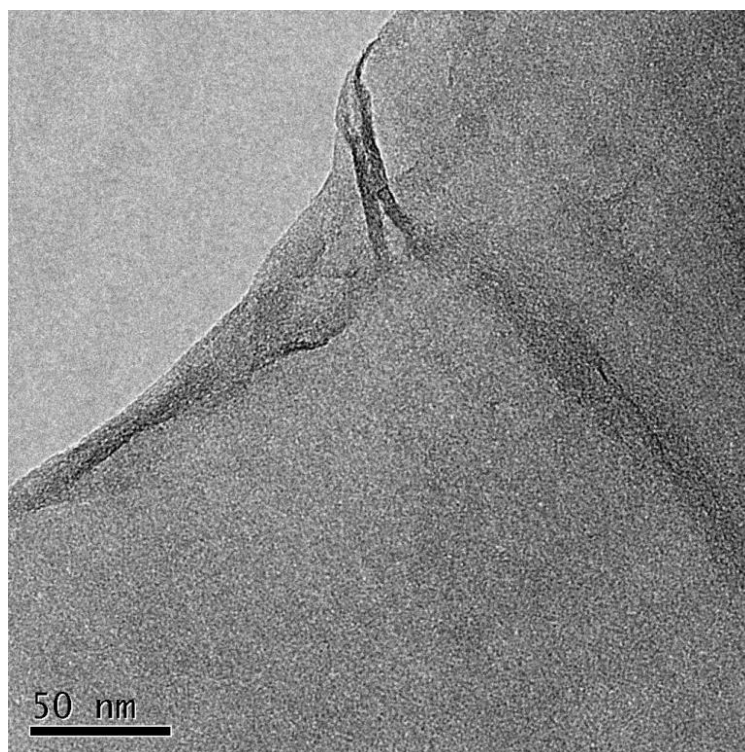

**Fig. S3.**

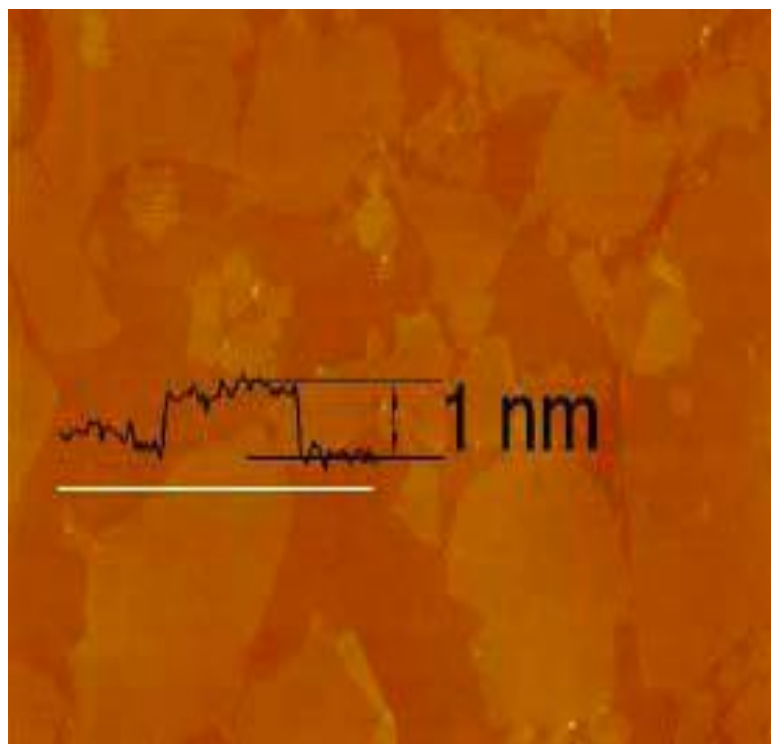

**Fig. S4.**

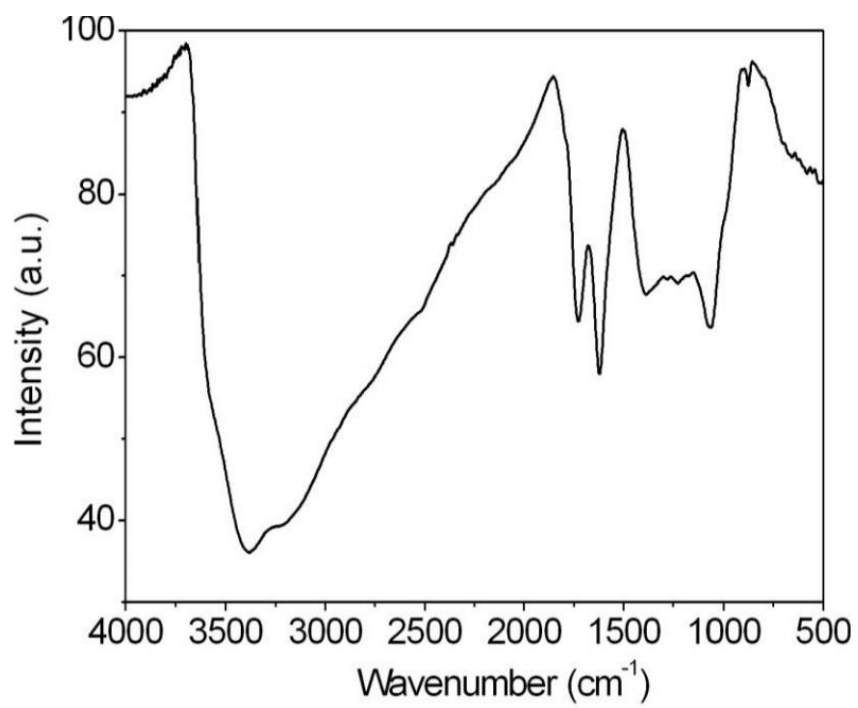

Fig. S5.

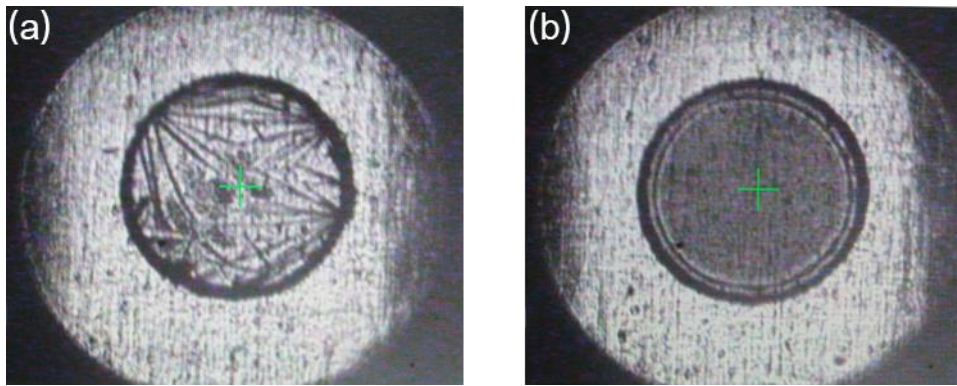

Fig. S6.

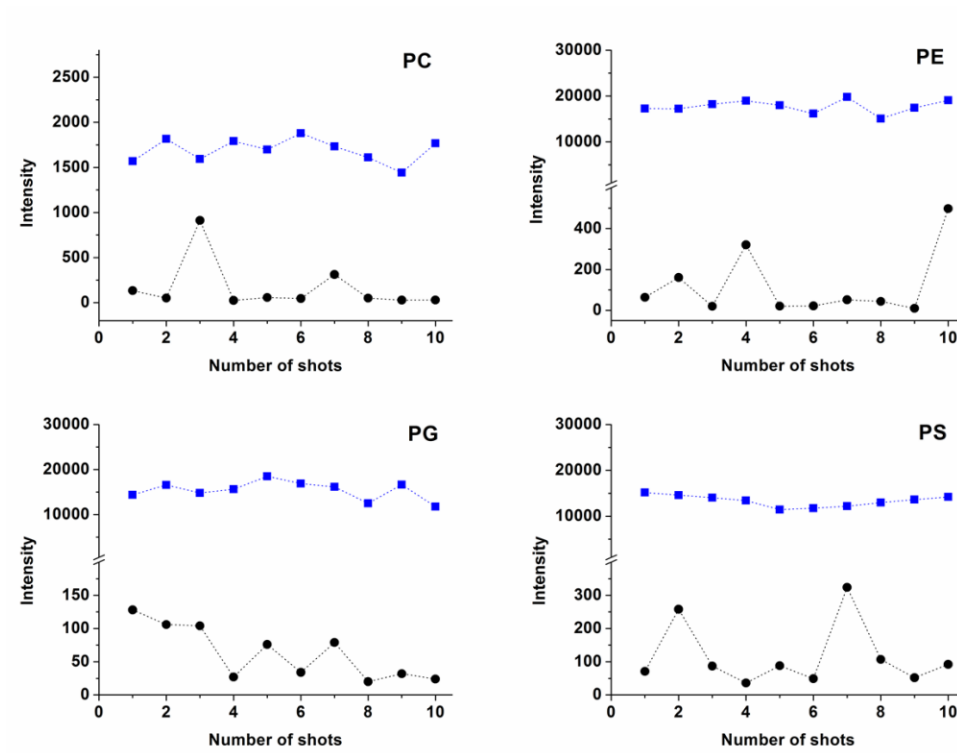

Fig. S7.

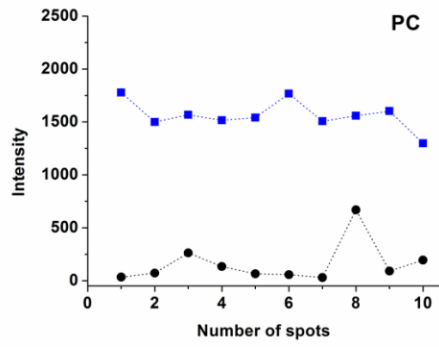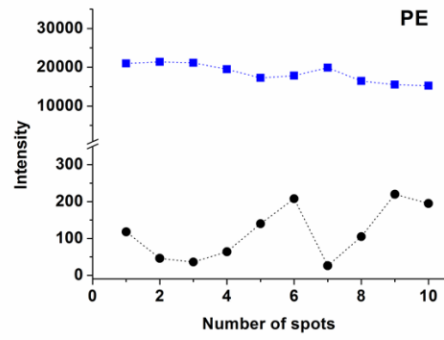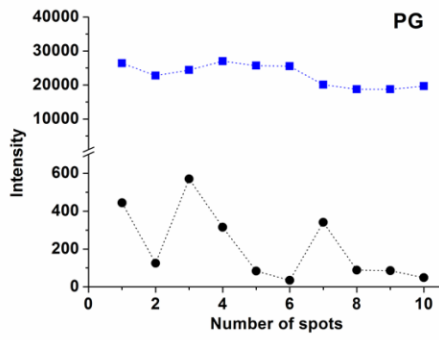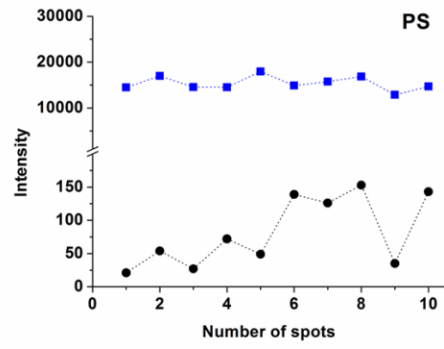

Fig. S8.

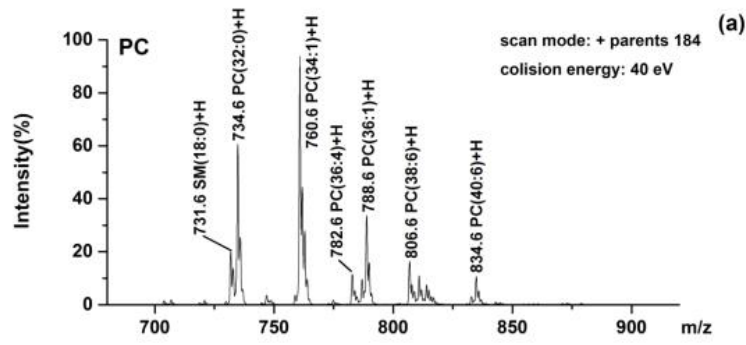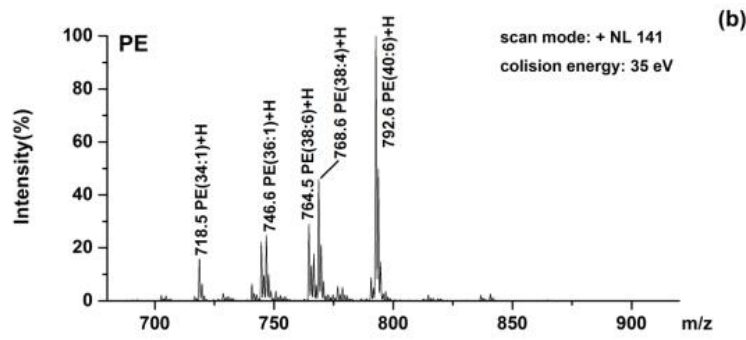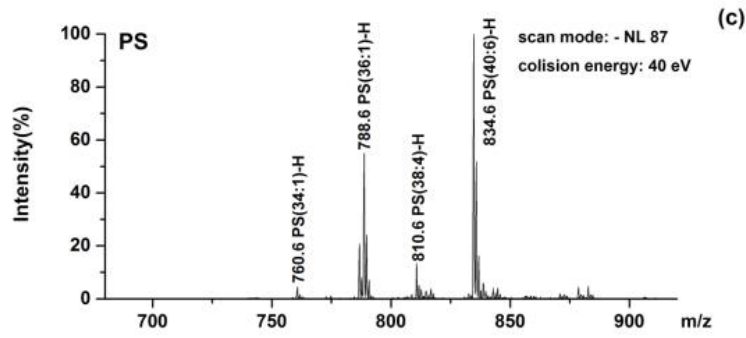



**Table S1.**

| experimental mass (m/z) | theoretical mass (m/z) | assignment    |
|-------------------------|------------------------|---------------|
| 711.37                  | 770.51                 | PC(32:1)+K-59 |
| 713.38                  | 772.52                 | PC(32:0)+K-59 |
| 735.37                  | 794.51                 | PC(34:3)+K-59 |
| 737.37                  | 796.52                 | PC(34:2)+K-59 |
| 739.39                  | 798.54                 | PC(34:1)+K-59 |
| 741.40                  | 800.56                 | PC(34:0)+K-59 |
| 759.38                  | 818.51                 | PC(36:5)+K-59 |
| 761.37                  | 820.52                 | PC(36:4)+K-59 |
| 763.39                  | 822.54                 | PC(36:3)+K-59 |
| 765.41                  | 824.56                 | PC(36:2)+K-59 |
| 767.47                  | 826.57                 | PC(36:1)+K-59 |
| 769.44                  | 828.59                 | PC(36:0)+K-59 |
| 785.40                  | 844.52                 | PC(38:6)+K-59 |
| 787.38                  | 846.54                 | PC(38:5)+K-59 |
| 789.40                  | 848.56                 | PC(38:4)+K-59 |
| 791.42                  | 850.57                 | PC(38:3)+K-59 |
| 793.44                  | 852.59                 | PC(38:2)+K-59 |
| 795.47                  | 854.60                 | PC(38:1)+K-59 |
| 797.46                  | 856.62                 | PC(38:0)+K-59 |
| 813.42                  | 872.56                 | PC(40:6)+K-59 |
| 815.42                  | 874.57                 | PC(40:5)+K-59 |
| 817.42                  | 876.59                 | PC(40:4)+K-59 |
| 821.46                  | 880.62                 | PC(40:2)+K-59 |
| 823.53                  | 882.64                 | PC(40:1)+K-59 |
| 738.40                  | 738.48                 | PE(34:2p)+K   |
| 740.40                  | 740.46                 | PE(34:1p)+K   |
| 754.40                  | 754.48                 | PE(34:2)+K    |
| 756.41                  | 756.49                 | PE(34:1)+K    |
| 758.42                  | 758.51                 | PE(34:0)+K    |
| 762.39                  | 762.48                 | PE(36:4p)+K   |
| 764.43                  | 764.50                 | PE(36:3p)+K   |

| experimental mass (m/z) | theoretical mass (m/z) | assignment                  |
|-------------------------|------------------------|-----------------------------|
| 766.48                  | 766.52                 | PE(36:2p)+K                 |
| 768.47                  | 768.53                 | PE(36:1p)+K                 |
| 778.40                  | 778.48                 | PE(36:4)+K                  |
| 780.43                  | 780.49                 | PE(36:3)+K                  |
| 782.47                  | 782.51                 | PE(36:2)+K                  |
| 784.46                  | 784.53                 | PE(36:1)+K                  |
| 786.40                  | 786.48                 | PE(38:6p)+K                 |
| 788.40                  | 788.50                 | PE(38:5p)+K                 |
| 790.42                  | 790.52                 | PE(38:4p)+K                 |
| 792.43                  | 792.53                 | PE(38:3p)+K                 |
| 794.48                  | 794.55                 | PE(38:2p)+K                 |
| 796.46                  | 796.56                 | PE(38:1p)+K                 |
| 802.39                  | 802.48                 | PE(38:6)+K                  |
| 804.41                  | 804.49                 | PE(38:5)+K                  |
| 806.42                  | 806.51                 | PE(38:4)+K                  |
| 808.43                  | 808.52                 | PE(38:3)+K                  |
| 810.49                  | 810.54                 | PE(38:2)+K                  |
| 814.42                  | 814.52                 | PE(40:6p)+K                 |
| 820.48                  | 820.56                 | PE(40:3p)+K                 |
| 830.42                  | 830.51                 | PE(40:6)+K                  |
| 832.43                  | 832.52                 | PE(40:5)+K                  |
| 834.45                  | 834.54                 | PE(40:4)+K                  |
| 800.40                  | 800.48                 | PS(34:1)+K                  |
| 826.42                  | 826.50                 | PS(36:2)+K                  |
| 828.43                  | 828.52                 | PS(36:1)+K                  |
| 852.51                  | 852.52                 | PS(38:3)+K                  |
| 854.47                  | 854.53                 | PS(38:2)+K                  |
| 872.43                  | 872.48                 | PS(40:7)+K                  |
| 874.40                  | 874.50                 | PS(40:6)+K                  |
| 878.48                  | 878.53                 | PS(40:4)+K                  |
| 710.40                  | 731.61                 | SM(18:0)+K-59               |
| 822.53                  | 822.62                 | GalCer/GluCer(d18:1/22:0)+K |
| 848.55                  | 848.64                 | GalCer/GluCer(d18:1/24:1)+K |
| 850.56                  | 850.65                 | GalCer/GluCer(d18:1/24:0)+K |

**Table S2.**

| experimental mass (m/z) | theoretical mass (m/z) | assignment             |
|-------------------------|------------------------|------------------------|
| 731.61                  | 731.61                 | SM(18:0)+H             |
| 734.57                  | 734.57                 | PC(32:0)+H             |
| 756.55                  | 756.55                 | PC(32:0)+Na            |
| 760.57                  | 760.58                 | PC(34:1)+H             |
| 762.60                  | 762.60                 | PC(34:0)+H             |
| 772.53                  | 772.53                 | PC(32:0)+K             |
| 782.57                  | 782.57                 | PC(34:1)+Na/PC(36:4)+H |
| 784.58                  | 784.58                 | PC(34:0)+Na            |
| 786.59                  | 786.60                 | PC(36:2)+H             |
| 788.62                  | 788.62                 | PC(36:1)+H             |
| 798.55                  | 798.54                 | PC(34:1)+K             |
| 800.56                  | 800.56                 | PC(34:0)+K             |
| 804.55                  | 804.55                 | PC(36:4)+Na            |
| 806.57                  | 806.57                 | PC(38:6)+H             |
| 808.59                  | 808.58                 | PC(36:2)+Na/PC(38:5)+H |
| 810.60                  | 810.60                 | PC(36:1)+Na/PC(38:4)+H |
| 820.54                  | 820.52                 | PC(36:4)+K             |
| 824.57                  | 824.56                 | PC(36:2)+K             |
| 826.58                  | 826.57                 | PC(36:1)+K             |
| 828.56                  | 828.55                 | PC(38:6)+Na            |
| 834.62                  | 834.60                 | PC(40:6)+H             |
| 836.62                  | 836.61                 | PC(40:5)+H             |
| 838.64                  | 838.63                 | PC(40:4)+H             |
| 844.53                  | 844.52                 | PC(38:6)+K             |
| 846.55                  | 846.54                 | PC(38:4)+K             |
| 856.69                  | 856.58                 | PC(40:6)+Na            |
| 872.67                  | 872.56                 | PC(40:6)+K             |
